# Supplementary material for: Cross-Cultural Adaptation and Psychometric Evaluation of the Educational Content Validation Instrument in Health
Source: PubMed Central journal article supplement — Inquiry. 2022 Mar 15;59:00469580211060143. doi: 10.1177/00469580211060143 (PMC8928379; doi:10.1177/00469580211060143), 2022-03-15
Supplement: sj-pdf-1-inq-10.1177_00469580211060143.pdf [file sj-pdf-1-inq-10.1177_00469580211060143.pdf]

## Cross-cultural adaptation and psychometric evaluation of the Educational Content Validation Instrument in Health

### Appendix 1. Educational Content Validation Instrument in Health - Spanish Version (ECVIH-SV).

#### Educational Content Validation Instrument in Health (ECVIH)

#### Instrumento de Validación de Contenido Educativo en Salud - Versión Española (ECVIH-SV).

INSTRUCCIONES: Utilice la siguiente escala para evaluar el material educativo en salud que desee. Puntúe con 0 si “está en desacuerdo”, 1 si está “parcialmente de acuerdo” y 2 si está “totalmente de acuerdo” las siguientes afirmaciones respecto al mismo.

| OBJETIVOS:<br>Propósitos, metas u objetivos     | 0 | 1 | 2 |
|-------------------------------------------------|---|---|---|
| 1 Contempla el tema propuesto                   |   |   |   |
| 2 Se adapta al proceso de enseñanza-aprendizaje |   |   |   |
| 3 Aclara dudas sobre el tema tratado            |   |   |   |
| 4 Promueve la reflexión sobre el tema           |   |   |   |
| 5 Promueve un cambio de actitud                 |   |   |   |

| ESTRUCTURA/PRESENTACION:<br>Organización, estructura, estrategia, consistencia y suficiencia | 0 | 1 | 2 |
|----------------------------------------------------------------------------------------------|---|---|---|
| 6 El lenguaje es apropiado para el público al que va dirigido                                |   |   |   |
| 7 El lenguaje es adecuado para el tipo de material educativo.                                |   |   |   |
| 8 Lenguaje es interactivo y promueve la participación en el proceso educativo                |   |   |   |
| 9 La información que ofrece es correcta                                                      |   |   |   |
| 10 La información que ofrece es objetiva                                                     |   |   |   |
| 11 La información que ofrece es aclaratoria                                                  |   |   |   |
| 12 La información que ofrece es necesaria                                                    |   |   |   |
| 13 Sigue una secuencia lógica de ideas                                                       |   |   |   |
| 14 El tema es actual                                                                         |   |   |   |
| 15.1 El tamaño del texto es adecuado*                                                        |   |   |   |
| 15.2 La narración/diálogos se escucha/n con claridad*                                        |   |   |   |

\*Utilizar la opción 15.1 para material escrito y opción 15.2 para material audiovisual.

| RELEVANCIA:<br>Significación, impacto, motivación e interés | 0 | 1 | 2 |
|-------------------------------------------------------------|---|---|---|
| 16 Fomenta el aprendizaje                                   |   |   |   |
| 17 Contribuye al conocimiento en esa área                   |   |   |   |
| 18 Despierta interés en el tema                             |   |   |   |

Autores:

ECVIH: S. de S. Leite, A.C.E. Áfio, L.V. de Carvalho, J.M. da Silva, P.C. de Almeida y L.M.F. Pagliuca.

ECVIH-SV: S. Cazorla-Calderón, J.M. Romero-Sánchez y O. Paloma-Castro.
