# Supplementary material for: Cross-Cultural Adaptation and Psychometric Evaluation of the Educational Content Validation Instrument in Health
Source: PubMed Central journal article supplement — Inquiry. 2022 Mar 15;59:00469580211060143. doi: 10.1177/00469580211060143 (PMC8928379; doi:10.1177/00469580211060143), 2022-03-15
Supplement: sj-pdf-2-inq-10.1177_00469580211060143.pdf [file sj-pdf-2-inq-10.1177_00469580211060143.pdf]

## Cross-cultural adaptation and psychometric evaluation of the Educational Content Validation Instrument in Health

**Appendix 2.** Educational Content Validation Instrument in Health (ECVIH) -12-items - Spanish version.

### **Educational Content Validation Instrument in Health (ECVIH) Instrumento de Validación de contenido educativo en salud - 12 ítems - Versión Española(ECVIH-12-SV).**

INSTRUCCIONES: Utilice la siguiente escala para evaluar el material educativo en salud que desee. Puntúe con 0 si “está en desacuerdo”, 1 si está “parcialmente de acuerdo” y 2 si está “totalmente de acuerdo” las siguientes afirmaciones respecto al mismo.

|                                                                               | 0 | 1 | 2 |
|-------------------------------------------------------------------------------|---|---|---|
| 1 Contempla el tema propuesto                                                 |   |   |   |
| 2 Se adapta al proceso de enseñanza-aprendizaje                               |   |   |   |
| 3 Promueve la reflexión sobre el tema                                         |   |   |   |
| 4 El lenguaje es adecuado para el tipo de material educativo.                 |   |   |   |
| 5 Lenguaje es interactivo y promueve la participación en el proceso educativo |   |   |   |
| 6 La información que ofrece es correcta                                       |   |   |   |
| 7 La información que ofrece es aclaratoria                                    |   |   |   |
| 8 La información que ofrece es necesaria                                      |   |   |   |
| 9 Sigue una secuencia lógica de ideas                                         |   |   |   |
| 10.1 El tamaño del texto es adecuado *                                        |   |   |   |
| 10.2 La narración/diálogos se escucha/n con claridad*                         |   |   |   |
| 11 Fomenta el aprendizaje                                                     |   |   |   |
| 12 Contribuye al conocimiento en esa área                                     |   |   |   |

*\*Utilizar la opción 15.1 para material escrito y opción 15.2 para material audiovisual.*

**Autores:**

*ECVIH: S. de S. Leite, A.C.E. Áfio, L.V. de Carvalho, J.M. da Silva, P.C. de Almeida y L.M.F. Pagliuca.*

*ECVIH-12-SV: S. Cazorla-Calderón, J.M. Romero-Sánchez; O. Paloma-Castro.*
